# Supplementary material
Source: PubMed Central journal article supplement (PMC4127088)
Supplement: NIHMS607524-supplement-01.pdf [file NIHMS607524-supplement-01.pdf]

**Supplementary table:** Sexual and contraceptive use history of BioCycle study participants by sexual activity category

|                                                   | Sexual Activity Category |                 |                                  |                |                     | <i>p</i> -value <sup>a</sup> |
|---------------------------------------------------|--------------------------|-----------------|----------------------------------|----------------|---------------------|------------------------------|
|                                                   | Total Cohort             | Sexual inactive | Not sexually active during study | Weekly or less | Greater than weekly |                              |
| n (%)                                             | 258                      | 59 (23)         | 64 (25)                          | 71 (28)        | 64 (25)             | -----                        |
| <b>Sexual history</b>                             |                          |                 |                                  |                |                     |                              |
| Ever sexually active                              |                          |                 |                                  |                |                     |                              |
| Yes                                               | 192 (74)                 | 0 (0)           | 64 (100)                         | 65 (92)        | 63 (98)             | <0.01                        |
| No                                                | 63 (24)                  | 59 (100)        | 0 (0)                            | 4 (6)          | 0 (0)               |                              |
| Missing                                           | 3 (1)                    |                 |                                  | 2 (3)          | 1 (2)               |                              |
| Currently sexually active <sup>b</sup>            |                          |                 |                                  |                |                     |                              |
| Yes                                               | 135 (70)                 | NA              | 17 (27)                          | 57 (88)        | 61 (97)             | <0.01                        |
| No                                                | 57 (30)                  | NA              | 47 (73)                          | 8 (12)         | 2 (3)               |                              |
| Sexual orientation <sup>b</sup>                   |                          |                 |                                  |                |                     |                              |
| Heterosexual                                      | 180 (94)                 | NA              | 58 (91)                          | 63 (97)        | 59 (94)             | 0.66                         |
| Lesbian                                           | 7 (4)                    | NA              | 4 (6)                            | 1 (2)          | 2 (3)               |                              |
| Bisexual                                          | 5 (3)                    | NA              | 2 (3)                            | 1 (2)          | 2 (3)               |                              |
| Ever used contraceptives <sup>b</sup>             |                          |                 |                                  |                |                     |                              |
| Yes                                               | 177 (92)                 | NA              | 55 (86)                          | 62 (95)        | 60 (95)             | 0.06                         |
| No                                                | 14 (7)                   | NA              | 9 (14)                           | 3 (5)          | 2 (3)               |                              |
| Missing                                           | 1 (1)                    | NA              | 0 (0)                            | 0 (0)          | 1 (2)               |                              |
| <b>Current contraceptive method<sup>b,c</sup></b> |                          |                 |                                  |                |                     |                              |
| Any male condom use                               | 68 (38)                  | NA              | 10 (18)                          | 29 (47)        | 29 (48)             | <0.01                        |
| Male condom use only                              | 47                       | NA              | 5                                | 21             | 21                  | <0.01                        |
| Male condom use plus other methods                | 21                       | NA              | 5                                | 8              | 8                   | 0.80                         |
| Other methods only                                | 17 (10)                  | NA              | 1 (2)                            | 6 (10)         | 10 (17)             | 0.02                         |
| No/unknown contraceptive method                   | 92 (52)                  | NA              | 44 (80)                          | 27 (44)        | 21 (35)             | <0.01                        |

1  
2  
3  
4  
5  
6  
7  
8  
9  
10  
11  
12  
13  
14  
15  
16  
17  
18  
19  
20  
21  
22  
23  
24  
25  
26  
27  
28  
29  
30  
31  
32  
33  
34  
35  
36  
37  
38  
39  
40  
41  
42  
43  
44  
45  
46  
47  
48  
49

<sup>a</sup> *P*-values calculated using Fisher's exact test.

<sup>b</sup> Only women who reported ever being sexually active were asked this question.

<sup>c</sup> Only women who reported ever using contraceptives were asked about current contraceptive method.
